## RESEARCH ARTICLE

# Effect of potassium fertilizer on the growth, physiological parameters, and water status of *Brassica juncea* cultivars under different irrigation regimes

Preeti Rani<sup>1</sup>, Ishan Saini<sup>1</sup>, Narender Singh<sup>1</sup>, Prashant Kaushik<sup>2\*</sup>, Leonard Wijaya<sup>3\*</sup>, Amal Al-Barty<sup>4</sup>, Hadeer Darwish<sup>5</sup>, Ahmed Noureideen<sup>4</sup>

**1** Department of Botany, Kurukshetra University, Kurukshetra, Haryana, India, **2** Instituto de Conservación y Mejora de la Agrodiversidad Valenciana, Universitat Politècnica de València, Valencia, Spain, **3** Department of Biology, Institut Teknologi Sumatera, Jalan Terusan Ryaudu, Way Hui, Jati Agung, South Lampung, Indonesia, **4** Department of Biology, College of Sciences, Taif University, Taif, Saudi Arabia, **5** Department of Biotechnology, College of Sciences, Taif University, Taif, Saudi Arabia

\* [prashantumri@gmail.com](mailto:prashantumri@gmail.com) (PK); [lwijaya@ksu.edu.sa](mailto:lwijaya@ksu.edu.sa) (LW)

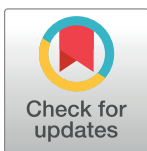

## OPEN ACCESS

**Citation:** Rani P, Saini I, Singh N, Kaushik P, Wijaya L, Al-Barty A, et al. (2021) Effect of potassium fertilizer on the growth, physiological parameters, and water status of *Brassica juncea* cultivars under different irrigation regimes. PLoS ONE 16(9): e0257023. <https://doi.org/10.1371/journal.pone.0257023>

**Editor:** Shahid Farooq, Harran Üniversitesi, Harran Üniversitesi, TURKEY

**Received:** February 24, 2021

**Accepted:** August 22, 2021

**Published:** September 23, 2021

**Copyright:** © 2021 Rani et al. This is an open access article distributed under the terms of the [Creative Commons Attribution License](https://creativecommons.org/licenses/by/4.0/), which permits unrestricted use, distribution, and reproduction in any medium, provided the original author and source are credited.

**Data Availability Statement:** All relevant data are within the manuscript.

**Funding:** The authors would like to extend their sincere appreciation to the Researchers Supporting Project Number (RSP-2020/180), King Saud University, Riyadh, Saudi Arabia. The Research in LW lab is supported by Institut Teknologi Sumatera under Research Grant for Hibah Mandiri ITERA 2021. The funders had no role in study design, data

## Abstract

Abiotic stress, especially a lack of water, can significantly reduce crop yields. In this study, we evaluated the physiological and biochemical effects of potassium sulfate ( $K_2SO_4$ ) fertilizer and varied irrigation regimes on the economically significant oilseed crop, *Brassica juncea* L, under open field conditions. Two cultivars (RH-725 and RH-749) of *B. juncea* were used in a randomized complete block design experiment with three replicates. Irrigation regimes consisted of a control (double irrigation: once at the 50% flowering and another at 50% fruiting stages), early irrigation (at 50% flowering only), late irrigation (at 50% fruiting only) and stress (no irrigation). The  $K_2SO_4$  applications were: control ( $K_0$ , no fertilization);  $K_1$ , 10 kg ha<sup>-1</sup>; and  $K_2$ , 20 kg ha<sup>-1</sup>. We measured growth via fresh and dry plant weight, plant height, root length, and leaf area. All the growth parameters were higher in RH-749. The physiological attributes, including the membrane stability index and relative water content, were higher at the 50% flowering stage in RH-749. The amount of antioxidant enzymes (catalase (CAT), guaiacol peroxidase (POX), ascorbate peroxidase (APX), and superoxide dismutase (SOD)) was enhanced when both plants were fertilized during water stress. All of these enzymes had higher activity in RH-749. The total chlorophyll content and photosynthesis rate were considerably higher in RH-749, which leaked fewer electrolytes and maintained a less destructive osmotic potential under limited water conditions. The results indicated that it is water-stress tolerant when given a high concentration of  $K_2SO_4$ , which alleviated the adverse effects of water stress on growth and physiology.

## Introduction

*Brassica juncea* L. (Indian mustard) is an economically important oilseed crop of the Brassicaceae family (mustard family), planted as a rabi (winter) crop mainly in northern and north-

collection and analysis, decision to publish, or preparation of the manuscript.

**Competing interests:** The authors have declared that no competing interests exist.

western India [1, 2]. As the country's population increases, so does the demand for oilseed crops. *B. juncea* is also used in phytoremediation of heavy metals like cadmium (Cd) and lead (Pb) [3]. *B. juncea* is valuable as a cooking oil [4]: 40% vegetable oil by weight with a caloric value of 541 (per 100 g) and a protein content of 38% [5]. It contains potassium (K), phosphorus (P), sodium (Na), iron (Fe), calcium (Ca), vitamin A, thiamine, niacin, glucosinolates (which regulate stress responses such as the formation of antioxidants), and erucic acid, associated with cardiac injury in cattle. As with any crop, the yield of *B. juncea* depends highly on environmental conditions and a primary causes of low productivity is abiotic stress from inadequate irrigation and fertilization [1].

Fertilizers, weedicides, fungicides, and pesticides are essential for increasing yields and continuing production throughout the year under optimal or sub-optimal weather conditions [6]. Water stress, an extended period of low precipitation, affects almost 40% of the 6–7 million hectares of farmland in India. Drought affects crop yields globally on a scale that affects the earth's carbon sink [7–9], and it will become a more severe problem for future farm production. Because populations continue to grow in water-scarce areas, deficit irrigation may be an efficient means to increase productivity. Water stress seriously impairs many physiological and metabolic processes and may also damage flower or seed development and be responsible for yield gaps [10]. Water stress correlates with high-temperature stress, particularly in arid and semi-arid regions like the state of Haryana in India [11].

Plants have evolved several molecular and physiological mechanisms to respond to environmental stresses, and for certain crop plants applying an additional potassium can enhance these responses [12]. Optimizing irrigation and fertilizer application to improve water retention, stomatal conductance, and light absorption, results in increased crop development and yield [13]. Potassium is an essential macronutrient and the most crucial osmoticum for vegetables [14]. It is required for a plant's mechanical stability, nutrition, development, reproduction, and resistance to pathogens [15]. Applying potassium can help to alleviate abiotic stress by increasing photosynthate translocation and enhancing gas exchange, protein synthesis, enzyme activity, and stomatal conductance [16, 17].

Moreover, potassium reduces water damage and stimulates anti-stress enzyme systems while enlarging the root system. This increases translocation, improves water absorption, reduces respiration, and increases photosynthetic activity, which enhances crop development and decreases lodging [18]. Therefore, we studied the effect of potassium fertilizer on the growth, physiological parameters, and water status of *B. juncea* cultivars under different water conditions.

## Materials and methods

### Experimental layout

The field experiment was carried out from October to March 2018–2019 and 2019–2020 at a nursery in Kurukshetra University, Kurukshetra, India (29°95'N; 76°82'E). Day, and night-time temperatures averaged  $30 \pm 4^\circ\text{C}$  and  $20 \pm 5^\circ\text{C}$ , respectively. The sandy-clayey loamy soil, was ploughed to create a uniform plot. The experiment was designed as a randomized complete block with a factorial treatment structure in three replicates. The four irrigation regimes induced water stress by withholding irrigation during a vital development stage (siliquae (fruit) development and flower initiation). It consisted of: control (irrigated twice, at the 50% flowering and 50% siliquae formation stages), late stress (once at 50% flowering), early stress (once at 50% siliquae formation), and total stress (no irrigation).

Two *Brassica* cultivars (RH-725 and RH-749) were fertilized at three  $\text{K}_2\text{SO}_4$  levels:  $\text{K}_0$  (0 kg/ha),  $\text{K}_1$  (10 kg/ha), and  $\text{K}_2$  (20 kg/ha), which were applied with the recommended rates of

**Table 1. The 12 treatments in the experiment.**

| Treatment no.   | Treatment code       | Treatment details                                                                                             |
|-----------------|----------------------|---------------------------------------------------------------------------------------------------------------|
| T <sub>1</sub>  | C + K <sub>0</sub> * | Control (2 irrigations: first at 50% flowering stage; second at 50% siliquae formation time) + K <sub>0</sub> |
| T <sub>2</sub>  | C + K <sub>1</sub> * | Control (2 irrigations: first at 50% flowering stage; second at 50% siliquae formation time) + K <sub>1</sub> |
| T <sub>3</sub>  | C + K <sub>2</sub> * | Control (2 irrigations: first at 50% flowering stage; second at 50% siliquae formation time) + K <sub>2</sub> |
| T <sub>4</sub>  | EI + K <sub>0</sub>  | Early irrigation (irrigation at 50% flowering stage only) + K <sub>0</sub>                                    |
| T <sub>5</sub>  | EI + K <sub>1</sub>  | Early irrigation (irrigation at 50% flowering stage only) + K <sub>1</sub>                                    |
| T <sub>6</sub>  | EI + K <sub>2</sub>  | Early irrigation (irrigation at 50% flowering stage only) + K <sub>2</sub>                                    |
| T <sub>7</sub>  | LI + K <sub>0</sub>  | Late irrigation (irrigation at 50% fruiting stage only) + K <sub>0</sub>                                      |
| T <sub>8</sub>  | LI + K <sub>1</sub>  | Late irrigation (irrigation at 50% fruiting stage only) + K <sub>1</sub>                                      |
| T <sub>9</sub>  | LI + K <sub>2</sub>  | Late irrigation (irrigation at 50% fruiting stage only) + K <sub>2</sub>                                      |
| T <sub>10</sub> | S + K <sub>0</sub>   | Stress (no irrigation) + K <sub>0</sub>                                                                       |
| T <sub>11</sub> | S + K <sub>1</sub>   | Stress (no irrigation) + K <sub>1</sub>                                                                       |
| T <sub>12</sub> | S + K <sub>2</sub>   | Stress (no irrigation) + K <sub>2</sub>                                                                       |

\* K = kg ha<sup>-1</sup> K<sub>2</sub>SO<sub>4</sub>: K<sub>0</sub> = 0; K<sub>1</sub> = 10; K<sub>2</sub> = 20.

<https://doi.org/10.1371/journal.pone.0257023.t001>

nitrogen (N), phosphorous (P) and K: urea, superphosphate, and potassium sulphate (K<sub>2</sub>SO<sub>4</sub>), respectively (Table 1). The seeds were obtained from the oilseed section of Chaudhary Charan Singh Hisar Agricultural University, Haryana. Previous physicochemical analysis of the soil showed that it consisted of 80.32% sand, 6.11% silt, 13.18% clay, 0.79% organic matter. The chemical content (kg/ha) were N, 110.15; P 7.59; K 439.61; and 106.49 sulphur (S) [19]. The soil pH was slightly basic at 7.9.

### Plant characterization and data analysis

At the flowering stage (day 65), we measured the root and shoot lengths and calculated the whole plant height. The roots were then separated from the shoot, blow-dried, and weighed to record their fresh weight (FW). They were then placed in an oven at 80°C overnight and weighed again to record their dry weight (DW). According to the manufacturer's instructions, the leaf area was measured using a portable leaf area meter (Systronics 211, Ahmedabad, India). Plants were harvested at maturity, and plant samples were collected from each plot at the flowering stage. The fresh and dry weights of leaves were measured as described above, and the water content was calculated according to the following equation: Leaf water content = ((FW–DW)/FW) × 100.

### Physiological and biochemical attributes

Chlorophyll content was measured using a CL-01 Chlorophyll Content Meter (Hansateh, Norfolk, UK) that absorbed two wavelengths of light (620 and 940 nm). The membrane stability index (MSI) was measured using methods described by Ali et al. [20]. Two similarly sized leaf disks (200 mg) were briefly collected and placed in test tubes containing 20 mL of double-distilled water. One test-tube was kept at 40°C for 30 min then cooled to 25°C before measuring the initial conductivity (C1) using a conductivity meter. Another test tube was placed in a boiling water bath (100°C) for 15 min and then cooled to 25°C before measuring conductivity (C2). The osmotic potential was measured on the third completely expanded leaf placed in tightly stoppered glass tubes and heated at 45°C for 1 hour to soften the tissue and remove

turgidity. The tissue was crushed with a glass rod and placed on a filter paper disc on a concave depression holder. The osmometer was calibrated using the reference standards of sodium chloride and used to measure each sample's osmotic potential.

Electrolyte leakage was measured as described by Dionisio-Sese and Tobita [21]. Briefly, a fresh leaf was immersed in a test tube containing deionized water. One tube was unheated, another was heated at 50–60°C for about 25 min, and the last at 100°C for 10 min. The electrical conductivities from leachates produced in the unheated (ECa) and heated (ECb), and (ECc) tubes were measured using an electrical conductivity meter.

### Stress parameters and enzymatic assay

To understand how the plants respond to stress, we evaluated the antioxidant defence system comprising peroxidase (POD), ascorbate peroxidase (APX), superoxide dismutase (SOD), and catalase (CAT). Briefly, 0.5 g of fresh leaves was homogenized with 100 mM Tris-HCl, 5.0 mM dithiothreitol, 10 mM magnesium chloride 5.0 mM magnesium acetate, 1.5% polyvinyl pyrrolidone (PVP)-40 and 1.0 mM EDTA. POX was extracted with a 0.01 M phosphate buffer. SOD activity was measured based on the conversion of nitroblue tetrazolium to formazan [22]. CAT activity was measured after the addition of 3 mL of 20 mM H<sub>2</sub>O<sub>2</sub> in 50 mM phosphate buffer [23]. APX activity was measured based on the decrease in absorbance at 290 nm due to ascorbic acid oxidation [24] (One enzyme unit was defined as the amount of enzyme required to oxidize 1 mole of ascorbic acid per min.) Glutathione reductase was measured using Halliwell and Foyer [25], which involved measuring the oxidation of NADPH by Glutathione reductase at 340 nm. The rate ( $\mu\text{moles min}^{-1}$ ) was calculated using the extinction coefficient of  $6.12 \text{ mM}^{-1} \text{ cm}^{-1}$ .

### Statistical analysis

Randomized complete block design (RCBD) was employed with three replications for two different cultivars of *B. juncea* (RH-725 and RH-749) under four irrigation schedules. Furthermore, the plants were supplied with varied amounts of K<sub>2</sub>SO<sub>4</sub>. Therefore, the data were analysed for three factors using the OPSTAT software (CCSHAU, Hisar). The critical difference (CD) was calculated at a 5% level of significance for comparing the means.

### Results

The higher application rate of K<sub>2</sub>SO<sub>4</sub> significantly improved the morphological traits of both *B. juncea* cultivars under low water conditions, including water stress. For example, the plant FW, DW, leaf area, and height were all higher in treatments with the highest concentration of K<sub>2</sub>SO<sub>4</sub> (Table 2). They were also significantly compared to the treatments without K<sub>2</sub>SO<sub>4</sub>, irrespective of irrigation level. Furthermore, the dry matter content of plants grown under late and no irrigation were also similar. The plants with the lowest dry matter contents were the following treatments: S + K<sub>0</sub>, LI + K<sub>0</sub>, and C + K<sub>0</sub>. The dry matter content of both cultivars were comparable except under stress conditions, where cultivar RH-749 performed better. The longest roots (21.7 cm) were measured in C + K<sub>2</sub> and EI + K<sub>2</sub>, whereas the shortest were found in treatment S + K<sub>0</sub>. Overall, RH-749 had longer roots than RH-725. Measurements of leaf area and plant height were the highest in treatments C + K<sub>2</sub> and EI + K<sub>2</sub>, while the lowest measurements were found in treatment S + K<sub>0</sub> (Fig 1). No irrigation generated the highest osmotic potential in treatments S + K<sub>0</sub>, S + K<sub>1</sub>, and S + K<sub>2</sub>, whereas the treatments with higher dosages of K<sub>2</sub>SO<sub>4</sub> (C + K<sub>2</sub>, EI + K<sub>2</sub>, and LI + K<sub>2</sub>) generated the lowest osmotic potentials.

The FWs of the control irrigation treatment with the high dosage of K<sub>2</sub>SO<sub>4</sub> (87 g) and that of the early irrigation treatment with the high dosage of K<sub>2</sub>SO<sub>4</sub> (88 g) were very similar. The

**Table 2. Effects of irrigation regime and potassium fertilizer on morphological traits of *Brassica juncea* cultivars.**

| Treatments*         | Dry matter (g)             |                             |                            | Root length (cm)           |                            |                            | Osmotic potential (MPa)      |                             |                             |
|---------------------|----------------------------|-----------------------------|----------------------------|----------------------------|----------------------------|----------------------------|------------------------------|-----------------------------|-----------------------------|
|                     | RH-725                     | RH-749                      | Mean                       | RH-725                     | RH-749                     | Mean                       | RH-725                       | RH-749                      | Mean                        |
| C + K <sub>0</sub>  | 4.25 ± 0.486 <sup>d</sup>  | 4.39 ± 0.636 <sup>d</sup>   | 4.32 ± 0.375 <sup>e</sup>  | 16.03 ± 0.597 <sup>d</sup> | 17.38 ± 1.735 <sup>f</sup> | 16.72 ± 1.526 <sup>e</sup> | 0.684 ± 0.412 <sup>de†</sup> | 0.578 ± 0.865 <sup>f</sup>  | 0.631 ± 0.045 <sup>d</sup>  |
| C + K <sub>1</sub>  | 5.27 ± 0.379 <sup>c</sup>  | 6.02 ± 0.824 <sup>c</sup>   | 5.65 ± 0.528 <sup>d</sup>  | 16.3 ± 0.835 <sup>d</sup>  | 18.44 ± 1.397 <sup>e</sup> | 17.24 ± 1.497 <sup>d</sup> | 0.574 ± 0.633 <sup>f</sup>   | 0.521 ± 0.453 <sup>f</sup>  | 0.548 ± 0.454 <sup>e</sup>  |
| C + K <sub>2</sub>  | 12.1 ± 0.176 <sup>ab</sup> | 12.86 ± 1.188 <sup>ab</sup> | 12.49 ± 0.833 <sup>b</sup> | 20.72 ± 0.473 <sup>a</sup> | 22.76 ± 1.282 <sup>a</sup> | 21.74 ± 1.914 <sup>a</sup> | 0.523 ± 0.595 <sup>f</sup>   | 0.479 ± 0.682 <sup>g</sup>  | 0.501 ± 0.127 <sup>e</sup>  |
| EI + K <sub>0</sub> | 4.55 ± 0.385 <sup>d</sup>  | 5.2 ± 1.034 <sup>d</sup>    | 4.88 ± 0.736 <sup>e</sup>  | 15.35 ± 1.976 <sup>e</sup> | 16.36 ± 0.649 <sup>g</sup> | 15.82 ± 1.277 <sup>f</sup> | 0.738 ± 0.377 <sup>d</sup>   | 0.675 ± 0.576 <sup>de</sup> | 0.707 ± 0.424 <sup>c</sup>  |
| EI + K <sub>1</sub> | 5.65 ± 1.034 <sup>c</sup>  | 6.25 ± 0.524 <sup>c</sup>   | 5.95 ± 0.517 <sup>d</sup>  | 18.37 ± 1.622 <sup>b</sup> | 20.36 ± 0.533 <sup>c</sup> | 19.32 ± 0.423 <sup>b</sup> | 0.643 ± 0.583 <sup>e</sup>   | 0.634 ± 0.398 <sup>e</sup>  | 0.639 ± 0.598 <sup>d</sup>  |
| EI + K <sub>2</sub> | 13.49 ± 0.975 <sup>a</sup> | 13.81 ± 0.371 <sup>a</sup>  | 13.65 ± 0.423 <sup>a</sup> | 21.22 ± 1.738 <sup>a</sup> | 22.36 ± 0.688 <sup>a</sup> | 21.74 ± 0.287 <sup>a</sup> | 0.623 ± 0.476 <sup>e</sup>   | 0.628 ± 0.484 <sup>e</sup>  | 0.626 ± 0.374 <sup>d</sup>  |
| LI + K <sub>0</sub> | 3.09 ± 0.487 <sup>e</sup>  | 3.15 ± 0.536 <sup>e</sup>   | 3.12 ± 0.253 <sup>f</sup>  | 15.32 ± 0.538 <sup>e</sup> | 15.71 ± 0.534 <sup>b</sup> | 15.56 ± 0.196 <sup>f</sup> | 0.835 ± 0.393 <sup>cd</sup>  | 0.758 ± 0.188 <sup>c</sup>  | 0.797 ± 0.936 <sup>bc</sup> |
| LI + K <sub>1</sub> | 4.57 ± 0.428 <sup>d</sup>  | 4.82 ± 1.045 <sup>d</sup>   | 4.69 ± 0.414 <sup>e</sup>  | 17.36 ± 0.494 <sup>c</sup> | 18.34 ± 0.696 <sup>e</sup> | 17.74 ± 1.064 <sup>d</sup> | 0.756 ± 0.876 <sup>d</sup>   | 0.727 ± 0.494 <sup>c</sup>  | 0.742 ± 0.094 <sup>c</sup>  |
| LI + K <sub>2</sub> | 10.34 ± 0.385 <sup>b</sup> | 11.26 ± 1.634 <sup>ab</sup> | 10.82 ± 1.832 <sup>c</sup> | 21.22 ± 0.727 <sup>a</sup> | 21.42 ± 0.488 <sup>b</sup> | 21.33 ± 0.758 <sup>a</sup> | 0.689 ± 0.273 <sup>e</sup>   | 0.675 ± 0.939 <sup>de</sup> | 0.682 ± 0.518 <sup>cd</sup> |
| S + K <sub>0</sub>  | 3.06 ± 0.399 <sup>e</sup>  | 2.92 ± 1.073 <sup>f</sup>   | 2.99 ± 1.635 <sup>g</sup>  | 13.37 ± 1.594 <sup>f</sup> | 15.79 ± 0.414 <sup>b</sup> | 14.51 ± 0.427 <sup>g</sup> | 1.045 ± 0.735 <sup>a</sup>   | 0.985 ± 1.045 <sup>a</sup>  | 1.015 ± 0.295 <sup>a</sup>  |
| S + K <sub>1</sub>  | 4.12 ± 0.287 <sup>d</sup>  | 4.93 ± 0.436 <sup>d</sup>   | 4.52 ± 1.836 <sup>e</sup>  | 15.35 ± 1.356 <sup>e</sup> | 18.55 ± 1.837 <sup>e</sup> | 16.73 ± 0.593 <sup>e</sup> | 0.937 ± 0.837 <sup>b</sup>   | 0.904 ± 1.674 <sup>a</sup>  | 0.921 ± 0.427 <sup>ab</sup> |
| S + K <sub>2</sub>  | 10.18 ± 0.293 <sup>b</sup> | 11.22 ± 0.520 <sup>ab</sup> | 10.72 ± 0.638 <sup>c</sup> | 18.51 ± 1.933 <sup>b</sup> | 19.31 ± 1.294 <sup>d</sup> | 18.73 ± 0.388 <sup>c</sup> | 0.859 ± 0.347 <sup>cd</sup>  | 0.845 ± 0.263 <sup>b</sup>  | 0.852 ± 0.044 <sup>b</sup>  |

\*C = Control, EI = Early irrigation, LI = Late irrigation, S = Stress,

†values in columns followed by the same letter are not significantly different,  $p \leq 0.05$ , LSD.

<https://doi.org/10.1371/journal.pone.0257023.t002>

plants with the lowest FWs were those treated with the lower dosages of K<sub>2</sub>SO<sub>4</sub> in EI + K<sub>0</sub> (18 g), LI + K<sub>0</sub> (16 g), and S + K<sub>0</sub> (14 g) (Fig 1).

The maximum relative water content was observed in cultivar RH-749, in treatment C + K<sub>2</sub> (85.05%); in this cultivar, the lowest relative water content was observed for treatment S + K<sub>0</sub> (69.74%) (Fig 2).

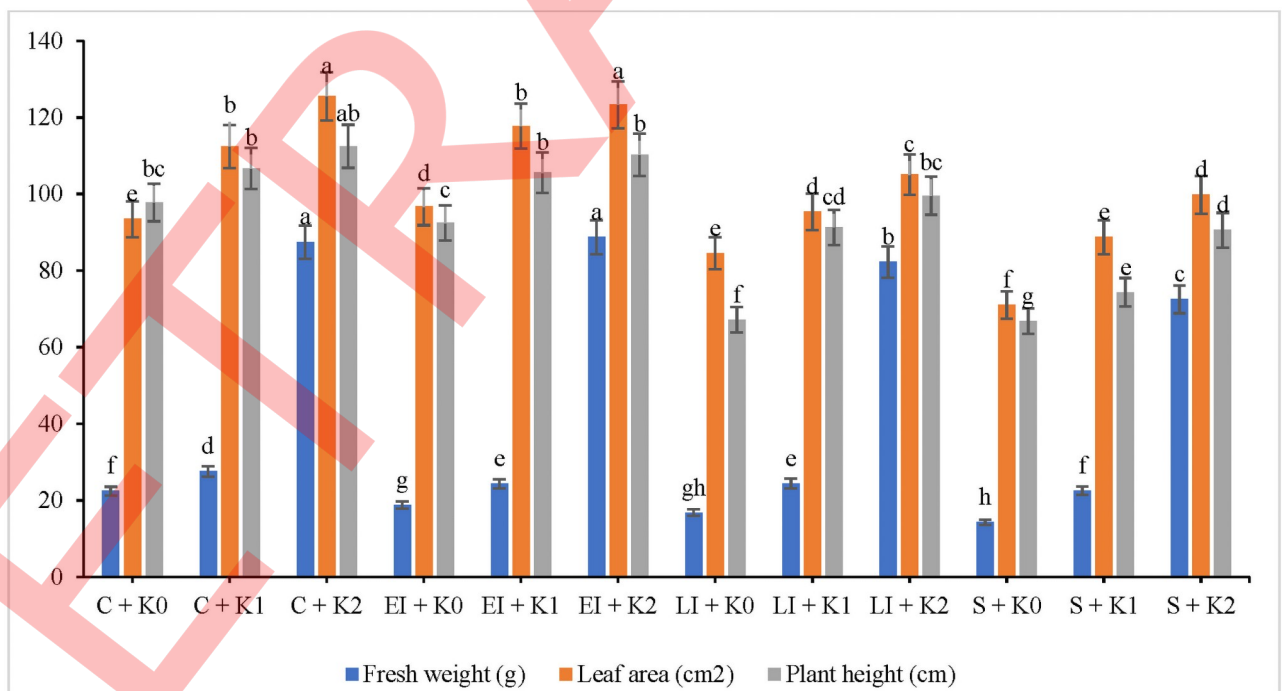

**Fig 1. Mean values of fresh weight (colour, g), leaf area (cm<sup>2</sup>) and plant height (cm) of the 12 treatments with different levels of irrigation (C = Control, EI = Early irrigation, LI = Late irrigation, S = Stress) and different amounts of K (kg ha<sup>-1</sup> K<sub>2</sub>SO<sub>4</sub>): K<sub>0</sub> = 0; K<sub>1</sub> = 10; K<sub>2</sub> = 20.**

<https://doi.org/10.1371/journal.pone.0257023.g001>

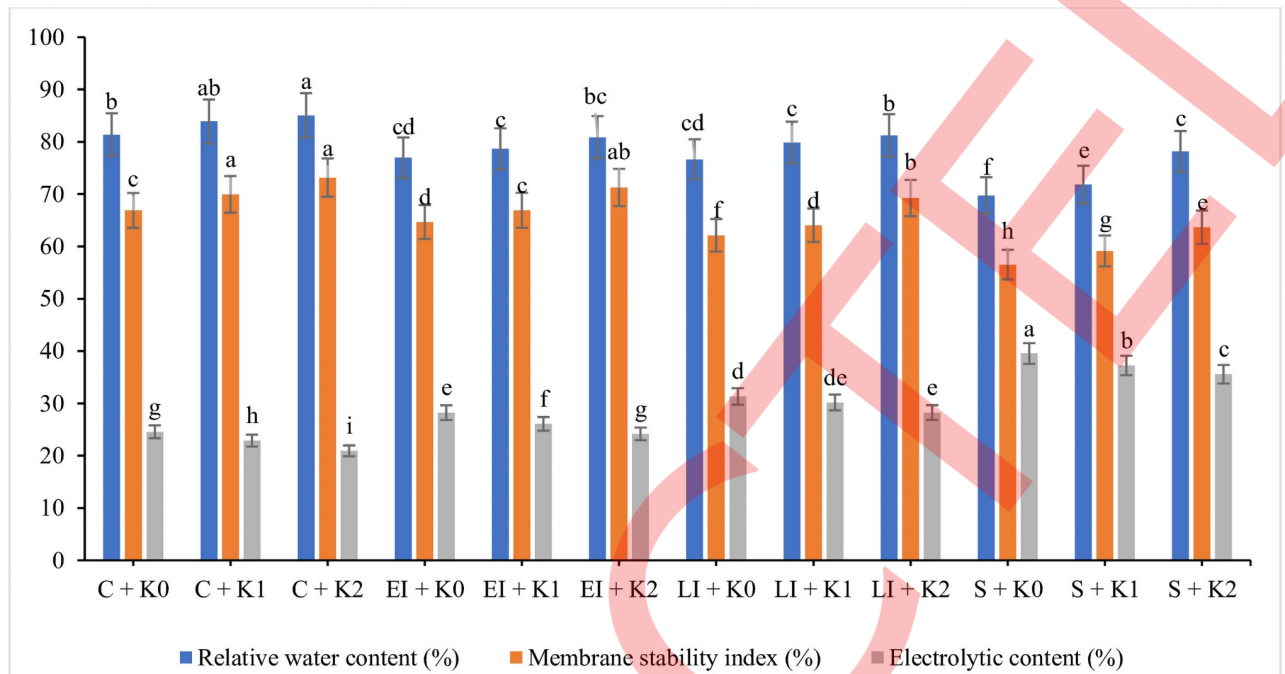

**Fig 2.** Mean values of the relative water content (%), membrane stability index (%) and electrolytic content (%) of the 12 treatments with different levels of irrigation (C = Control, EI = Early irrigation, LI = Late irrigation, S = Stress) and different amounts of K ( $\text{kg ha}^{-1} \text{K}_2\text{SO}_4$ ): ( $\text{K}_0 = 0$ ;  $\text{K}_1 = 10$ ;  $\text{K}_2 = 20$ ).

<https://doi.org/10.1371/journal.pone.0257023.g002>

In general, cultivar RH-749 performed better in the vegetative growth parameters. Membrane stability index values of 73.16 and 71.27% were recorded in the treatments C +  $\text{K}_2$  and EI +  $\text{K}_2$ , respectively, while the lowest values (56.54 and 59.14%) were found in treatments S +  $\text{K}_0$  and S +  $\text{K}_1$ , respectively (Fig 2). The highest level of electrolyte leakage occurred in treatments without irrigation, i.e., S +  $\text{K}_0$ , S +  $\text{K}_1$ , and S +  $\text{K}_2$ , whereas the lowest levels of electrolyte leakage occurred with higher amounts of  $\text{K}_2\text{SO}_4$  (C +  $\text{K}_2$ , EI +  $\text{K}_2$ , and LI +  $\text{K}_2$ ) (Fig 2).

The results in Table 3 revealed that the levels of all the antioxidant enzymes increased in the leaves of both *B. juncea* cultivars under stress conditions, but were significantly higher in the more water-stress-tolerant RH 749. Specifically, the highest activities of SOD ( $\text{U g}^{-1} \text{FW}$ ) were recorded in treatments S +  $\text{K}_2$  ( $26.59 \text{ U g}^{-1} \text{FW}$ ), LI +  $\text{K}_2$  ( $23.68 \text{ U g}^{-1} \text{FW}$ ), and EI +  $\text{K}_2$  ( $22.01 \text{ U g}^{-1} \text{FW}$ ), whereas the lowest was measured in treatment C +  $\text{K}_0$  ( $14.89 \text{ U g}^{-1} \text{FW}$ ). APX activities were highest under stress conditions in treatments S +  $\text{K}_2$  ( $10.31 \text{ U g}^{-1} \text{FW}$ ), S +  $\text{K}_1$  ( $9.67 \text{ U g}^{-1} \text{FW}$ ), and S +  $\text{K}_0$  ( $8.80 \text{ U g}^{-1} \text{FW}$ ) (Table 3). Surprisingly, the ascorbate peroxidase activities of treatments LI +  $\text{K}_1$  ( $4.02 \text{ U g}^{-1} \text{FW}$ ) and LI +  $\text{K}_2$  ( $4.71 \text{ U g}^{-1} \text{FW}$ ) were less than 50% that of the highest ascorbate peroxidase activities (Table 4). The findings for catalase activity (Table 3) were similar to those of ascorbate peroxidase. The highest catalase activities were observed under stress conditions in treatments S +  $\text{K}_2$  ( $15.35 \text{ U g}^{-1} \text{FW}$ ), S +  $\text{K}_1$  ( $11.86 \text{ U g}^{-1} \text{FW}$ ), and S +  $\text{K}_0$  ( $7.88 \text{ U g}^{-1} \text{FW}$ ). In contrast, the lowest activities were observed for treatments LI +  $\text{K}_1$  ( $3.60 \text{ U g}^{-1} \text{FW}$ ) and LI +  $\text{K}_2$  ( $4.22 \text{ U g}^{-1} \text{FW}$ ) (Table 3).

In Table 4, decreasing water availability resulted in decreased chlorophyll a and b. However, carotenoid levels increased. The highest levels of chlorophyll a were observed in treatments C +  $\text{K}_2$  ( $3.17 \text{ mg g}^{-1} \text{FW}$ ), C +  $\text{K}_1$  ( $3.02 \text{ mg g}^{-1} \text{FW}$ ), and EI +  $\text{K}_2$  ( $2.71 \text{ mg g}^{-1} \text{FW}$ ), with the highest chlorophyll b levels occurring in the same treatments at concentrations of 1.11, 1.05, and  $0.90 \text{ mg g}^{-1} \text{FW}$ , respectively. Meanwhile, the lowest levels of total chlorophyll (chlorophylls

Table 3. Effects of irrigation regime and potassium fertilizer on antioxidant activity of *Brassica juncea* cultivars.

| Treatments*         | Superoxidase dismutase (U g <sup>-1</sup> FW) |                             |                             | Peroxidase (U g <sup>-1</sup> FW) |                            |                            | Ascorbate Peroxidase (U g <sup>-1</sup> FW) |                            |                            | Catalase (U g <sup>-1</sup> FW) |                            |                            |
|---------------------|-----------------------------------------------|-----------------------------|-----------------------------|-----------------------------------|----------------------------|----------------------------|---------------------------------------------|----------------------------|----------------------------|---------------------------------|----------------------------|----------------------------|
|                     | RH-725                                        | RH-749                      | Mean                        | RH-725                            | RH-749                     | Mean                       | RH-725                                      | RH-749                     | Mean                       | RH-725                          | RH-749                     | Mean                       |
| C + K <sub>0</sub>  | 12.62 ± 0.545 <sup>**</sup>                   | 17.16 ± 0.785 <sup>b</sup>  | 14.89 ± 0.756 <sup>b</sup>  | 4.16 ± 1.455 <sup>b</sup>         | 8.17 ± 0.375 <sup>b</sup>  | 15.60 ± 0.544 <sup>i</sup> | 2.75 ± 0.055 <sup>h</sup>                   | 6.83 ± 0.496 <sup>h</sup>  | 5.85 ± 0.485 <sup>f</sup>  | 2.03 ± 0.676 <sup>i</sup>       | 4.36 ± 0.546 <sup>i</sup>  | 5.24 ± 1.198 <sup>c</sup>  |
| C + K <sub>1</sub>  | 13.25 ± 0.387 <sup>b</sup>                    | 18.52 ± 0.376 <sup>b</sup>  | 15.89 ± 0.645 <sup>b</sup>  | 5.02 ± 1.856 <sup>b</sup>         | 10.25 ± 0.457 <sup>b</sup> | 16.71 ± 1.275 <sup>b</sup> | 4.31 ± 0.156 <sup>b</sup>                   | 7.31 ± 0.276 <sup>gh</sup> | 6.27 ± 0.377 <sup>c</sup>  | 3.12 ± 0.457 <sup>i</sup>       | 4.98 ± 0.857 <sup>i</sup>  | 5.61 ± 1.036 <sup>c</sup>  |
| C + K <sub>2</sub>  | 14.83 ± 0.598 <sup>b</sup>                    | 21.68 ± 0.488 <sup>f</sup>  | 18.26 ± 0.427 <sup>b</sup>  | 5.56 ± 1.158 <sup>b</sup>         | 11.52 ± 1.634 <sup>f</sup> | 19.33 ± 0.856 <sup>f</sup> | 4.98 ± 0.534 <sup>b</sup>                   | 9.59 ± 0.329 <sup>b</sup>  | 7.25 ± 0.948 <sup>d</sup>  | 3.76 ± 0.544 <sup>h</sup>       | 6.73 ± 0.745 <sup>h</sup>  | 6.49 ± 0.578 <sup>d</sup>  |
| EI + K <sub>0</sub> | 11.75 ± 1.074 <sup>i</sup>                    | 18.48 ± 0.535 <sup>b</sup>  | 15.12 ± 0.535 <sup>b</sup>  | 9.63 ± 1.474 <sup>de</sup>        | 13.75 ± 1.887 <sup>c</sup> | 16.17 ± 0.587 <sup>b</sup> | 6.55 ± 0.945 <sup>f</sup>                   | 8.62 ± 0.457 <sup>f</sup>  | 6.06 ± 0.635 <sup>c</sup>  | 4.25 ± 0.647 <sup>gh</sup>      | 6.59 ± 0.548 <sup>h</sup>  | 5.43 ± 0.860 <sup>c</sup>  |
| EI + K <sub>1</sub> | 16.21 ± 0.646 <sup>c</sup>                    | 22.34 ± 0.587 <sup>f</sup>  | 19.28 ± 1.748 <sup>d</sup>  | 13.21 ± 1.677 <sup>c</sup>        | 15.45 ± 0.647 <sup>d</sup> | 20.23 ± 0.494 <sup>f</sup> | 9.62 ± 0.647 <sup>d</sup>                   | 11.08 ± 0.785 <sup>c</sup> | 7.59 ± 0.427 <sup>d</sup>  | 5.51 ± 1.853 <sup>gh</sup>      | 8.92 ± 0.638 <sup>gh</sup> | 6.80 ± 0.387 <sup>d</sup>  |
| EI + K <sub>2</sub> | 18.33 ± 0.578 <sup>d</sup>                    | 25.68 ± 0.374 <sup>de</sup> | 22.01 ± 1.937 <sup>bc</sup> | 14.65 ± 1.577 <sup>c</sup>        | 17.58 ± 0.294 <sup>c</sup> | 23.15 ± 1.748 <sup>c</sup> | 10.29 ± 0.585 <sup>cd</sup>                 | 13.77 ± 0.218 <sup>d</sup> | 8.68 ± 0.582 <sup>c</sup>  | 7.82 ± 0.567 <sup>fg</sup>      | 10.18 ± 0.655 <sup>g</sup> | 7.78 ± 0.644 <sup>c</sup>  |
| LI + K <sub>0</sub> | 13.65 ± 0.385 <sup>b</sup>                    | 23.11 ± 0.858 <sup>e</sup>  | 18.38 ± 1.673 <sup>c</sup>  | 7.36 ± 0.368 <sup>f</sup>         | 12.55 ± 1.057 <sup>f</sup> | 19.86 ± 1.949 <sup>f</sup> | 7.52 ± 0.694 <sup>e</sup>                   | 9.72 ± 0.576 <sup>c</sup>  | 7.45 ± 0.545 <sup>d</sup>  | 8.21 ± 0.954 <sup>f</sup>       | 9.02 ± 0.567 <sup>f</sup>  | 6.67 ± 0.396 <sup>d</sup>  |
| LI + K <sub>1</sub> | 15.58 ± 0.844 <sup>f</sup>                    | 25.18 ± 0.812 <sup>de</sup> | 20.38 ± 1.575 <sup>bc</sup> | 8.16 ± 0.474 <sup>de</sup>        | 13.26 ± 1.685 <sup>e</sup> | 10.71 ± 1.844 <sup>e</sup> | 11.67 ± 0.587 <sup>cd</sup>                 | 13.61 ± 0.938 <sup>d</sup> | 4.02 ± 0.648 <sup>g</sup>  | 10.26 ± 1.057 <sup>d</sup>      | 11.53 ± 0.388 <sup>d</sup> | 3.60 ± 0.947 <sup>g</sup>  |
| LI + K <sub>2</sub> | 19.82 ± 0.478 <sup>c</sup>                    | 27.53 ± 0.475 <sup>c</sup>  | 23.68 ± 1.436 <sup>bc</sup> | 10.75 ± 0.833 <sup>d</sup>        | 14.38 ± 0.474 <sup>e</sup> | 12.57 ± 1.596 <sup>b</sup> | 14.73 ± 0.855 <sup>c</sup>                  | 16.58 ± 0.485 <sup>c</sup> | 4.71 ± 0.937 <sup>g</sup>  | 12.57 ± 1.268 <sup>b</sup>      | 15.17 ± 0.576 <sup>b</sup> | 4.22 ± 0.598 <sup>f</sup>  |
| S + K <sub>0</sub>  | 18.16 ± 0.245 <sup>d</sup>                    | 26.24 ± 0.339 <sup>d</sup>  | 22.20 ± 1.365 <sup>c</sup>  | 11.98 ± 0.475 <sup>d</sup>        | 15.88 ± 0.288 <sup>d</sup> | 23.46 ± 0.497 <sup>d</sup> | 9.52 ± 0.687 <sup>d</sup>                   | 11.17 ± 0.858 <sup>c</sup> | 8.80 ± 0.635 <sup>c</sup>  | 9.52 ± 1.098 <sup>c</sup>       | 10.05 ± 0.247 <sup>c</sup> | 7.88 ± 0.588 <sup>c</sup>  |
| S + K <sub>1</sub>  | 21.19 ± 0.574 <sup>ab</sup>                   | 28.19 ± 1.475 <sup>b</sup>  | 24.69 ± 1.439 <sup>b</sup>  | 19.58 ± 1.736 <sup>b</sup>        | 20.82 ± 0.684 <sup>b</sup> | 25.78 ± 0.655 <sup>b</sup> | 15.12 ± 0.454 <sup>b</sup>                  | 18.19 ± 0.645 <sup>b</sup> | 9.67 ± 0.597 <sup>b</sup>  | 11.16 ± 0.675 <sup>c</sup>      | 12.56 ± 0.588 <sup>c</sup> | 11.86 ± 0.274 <sup>b</sup> |
| S + K <sub>2</sub>  | 23.68 ± 0.939 <sup>a</sup>                    | 29.49 ± 1.938 <sup>a</sup>  | 26.59 ± 1.934 <sup>a</sup>  | 21.62 ± 0.424 <sup>a</sup>        | 22.52 ± 0.483 <sup>a</sup> | 27.49 ± 0.487 <sup>a</sup> | 17.08 ± 0.937 <sup>a</sup>                  | 20.11 ± 0.578 <sup>a</sup> | 10.31 ± 0.654 <sup>a</sup> | 13.17 ± 0.957 <sup>a</sup>      | 17.52 ± 0.387 <sup>a</sup> | 15.35 ± 0.487 <sup>a</sup> |

\* C = Control, EI = Early irrigation, LI = Late irrigation, S = Stress,

<sup>†</sup> values in columns followed by the same letter are not significantly different,  $p \leq 0.05$ , LSD.

<https://doi.org/10.1371/journal.pone.0257023.t003>

Table 4. Effects of irrigation regime and potassium fertilizer on chlorophyll and carotenoid contents of *Brassica juncea* cultivars.

| Treatments*         | Chlorophyll a (mg g <sup>-1</sup> FW) |                            |                            | Chlorophyll b (mg g <sup>-1</sup> FW) |                            |                            | Total chlorophyll (mg g <sup>-1</sup> FW) |                            |                            | Carotenoid (mg g <sup>-1</sup> FW) |                            |                           |
|---------------------|---------------------------------------|----------------------------|----------------------------|---------------------------------------|----------------------------|----------------------------|-------------------------------------------|----------------------------|----------------------------|------------------------------------|----------------------------|---------------------------|
|                     | RH-725                                | RH-749                     | Mean                       | RH-725                                | RH-749                     | Mean                       | RH-725                                    | RH-749                     | Mean                       | RH-725                             | RH-749                     | Mean                      |
| C + K <sub>0</sub>  | 2.76 ± 0.754 <sup>ab</sup>            | 3.03 ± 0.676 <sup>b</sup>  | 2.90 ± 0.597 <sup>b</sup>  | 0.94 ± 0.245 <sup>b</sup>             | 1.12 ± 0.463 <sup>b</sup>  | 1.03 ± 0.435 <sup>b</sup>  | 3.71 ± 0.476 <sup>b</sup>                 | 4.16 ± 0.264 <sup>b</sup>  | 3.93 ± 0.344 <sup>b</sup>  | 0.23 ± 0.656 <sup>b</sup>          | 0.39 ± 0.254 <sup>b</sup>  | 0.31 ± 0.593 <sup>b</sup> |
| C + K <sub>1</sub>  | 2.83 ± 0.635 <sup>ab</sup>            | 3.21 ± 0.698 <sup>b</sup>  | 3.02 ± 0.534 <sup>ab</sup> | 0.95 ± 0.734 <sup>b</sup>             | 1.15 ± 0.266 <sup>b</sup>  | 1.05 ± 0.377 <sup>b</sup>  | 3.78 ± 0.746 <sup>ab</sup>                | 4.37 ± 0.674 <sup>ab</sup> | 4.08 ± 0.653 <sup>a</sup>  | 0.45 ± 0.753 <sup>f</sup>          | 0.51 ± 0.586 <sup>ef</sup> | 0.48 ± 0.686 <sup>f</sup> |
| C + K <sub>2</sub>  | 2.97 ± 0.954 <sup>a</sup>             | 3.36 ± 1.085 <sup>a</sup>  | 3.17 ± 0.237 <sup>a</sup>  | 1.01 ± 0.343 <sup>a</sup>             | 1.21 ± 0.438 <sup>a</sup>  | 1.11 ± 0.466 <sup>a</sup>  | 3.98 ± 0.548 <sup>a</sup>                 | 4.57 ± 0.384 <sup>a</sup>  | 4.28 ± 0.237 <sup>a</sup>  | 0.87 ± 0.837 <sup>b</sup>          | 0.89 ± 0.487 <sup>b</sup>  | 0.88 ± 0.268 <sup>b</sup> |
| EI + K <sub>0</sub> | 2.58 ± 0.648 <sup>cd</sup>            | 2.69 ± 0.697 <sup>c</sup>  | 2.64 ± 0.944 <sup>c</sup>  | 0.86 ± 0.125 <sup>bc</sup>            | 0.87 ± 0.166 <sup>bc</sup> | 0.86 ± 0.275 <sup>c</sup>  | 3.44 ± 0.578 <sup>c</sup>                 | 3.56 ± 0.187 <sup>c</sup>  | 3.50 ± 0.566 <sup>c</sup>  | 0.38 ± 0.935 <sup>g</sup>          | 0.39 ± 0.277 <sup>g</sup>  | 0.39 ± 0.385 <sup>g</sup> |
| EI + K <sub>1</sub> | 2.61 ± 0.698 <sup>cd</sup>            | 2.72 ± 0.124 <sup>c</sup>  | 2.67 ± 0.247 <sup>d</sup>  | 0.87 ± 0.464 <sup>d</sup>             | 0.88 ± 0.344 <sup>d</sup>  | 0.88 ± 0.437 <sup>d</sup>  | 3.49 ± 0.765 <sup>d</sup>                 | 3.61 ± 0.475 <sup>d</sup>  | 3.55 ± 0.544 <sup>d</sup>  | 0.48 ± 0.856 <sup>f</sup>          | 0.50 ± 0.684 <sup>ef</sup> | 0.49 ± 0.594 <sup>f</sup> |
| EI + K <sub>2</sub> | 2.66 ± 0.454 <sup>cd</sup>            | 2.75 ± 0.286 <sup>c</sup>  | 2.71 ± 0.38 <sup>cd</sup>  | 0.89 ± 1.056 <sup>d</sup>             | 0.92 ± 0.386 <sup>cd</sup> | 0.90 ± 0.645 <sup>cd</sup> | 3.56 ± 0.374 <sup>cd</sup>                | 3.67 ± 0.453 <sup>cd</sup> | 3.61 ± 0.475 <sup>cd</sup> | 0.90 ± 0.585 <sup>b</sup>          | 0.92 ± 0.663 <sup>b</sup>  | 0.91 ± 0.577 <sup>b</sup> |
| LI + K <sub>0</sub> | 2.21 ± 0.576 <sup>ef</sup>            | 2.24 ± 0.476 <sup>f</sup>  | 2.25 ± 0.476 <sup>f</sup>  | 0.72 ± 1.856 <sup>f</sup>             | 0.81 ± 0.547 <sup>f</sup>  | 0.76 ± 0.479 <sup>f</sup>  | 2.94 ± 0.596 <sup>f</sup>                 | 3.10 ± 0.688 <sup>f</sup>  | 3.02 ± 0.876 <sup>f</sup>  | 0.42 ± 0.575 <sup>f</sup>          | 0.43 ± 0.386 <sup>f</sup>  | 0.42 ± 0.597 <sup>f</sup> |
| LI + K <sub>1</sub> | 2.25 ± 0.785 <sup>ef</sup>            | 2.31 ± 0.588 <sup>e</sup>  | 2.28 ± 0.935 <sup>ef</sup> | 0.76 ± 0.578 <sup>ef</sup>            | 0.83 ± 0.573 <sup>f</sup>  | 0.80 ± 0.526 <sup>f</sup>  | 3.01 ± 0.587 <sup>ef</sup>                | 3.15 ± 0.238 <sup>ef</sup> | 3.08 ± 0.597 <sup>ef</sup> | 0.52 ± 0.376 <sup>e</sup>          | 0.56 ± 0.543 <sup>e</sup>  | 0.54 ± 0.645 <sup>e</sup> |
| LI + K <sub>2</sub> | 2.28 ± 0.364 <sup>ef</sup>            | 2.36 ± 0.485 <sup>ef</sup> | 2.32 ± 0.484 <sup>ef</sup> | 0.78 ± 0.386 <sup>ef</sup>            | 0.84 ± 0.526 <sup>f</sup>  | 0.81 ± 0.637 <sup>f</sup>  | 3.07 ± 0.587 <sup>ef</sup>                | 3.20 ± 1.736 <sup>ef</sup> | 3.13 ± 0.476 <sup>de</sup> | 1.01 ± 0.737 <sup>a</sup>          | 1.56 ± 0.476 <sup>a</sup>  | 1.29 ± 0.586 <sup>a</sup> |
| S + K <sub>0</sub>  | 2.05 ± 0.346 <sup>g</sup>             | 2.11 ± 0.699 <sup>g</sup>  | 2.08 ± 0.296 <sup>g</sup>  | 0.62 ± 0.375 <sup>g</sup>             | 0.67 ± 0.848 <sup>g</sup>  | 0.65 ± 0.685 <sup>g</sup>  | 2.67 ± 0.645 <sup>g</sup>                 | 2.79 ± 1.936 <sup>g</sup>  | 2.73 ± 0.847 <sup>g</sup>  | 0.62 ± 0.584 <sup>d</sup>          | 0.64 ± 0.528 <sup>d</sup>  | 0.63 ± 0.638 <sup>d</sup> |
| S + K <sub>1</sub>  | 2.26 ± 0.768 <sup>ef</sup>            | 2.32 ± 0.276 <sup>c</sup>  | 2.30 ± 0.776 <sup>c</sup>  | 0.76 ± 0.547 <sup>c</sup>             | 0.82 ± 0.325 <sup>c</sup>  | 0.79 ± 0.797 <sup>c</sup>  | 3.02 ± 0.958 <sup>c</sup>                 | 3.14 ± 0.526 <sup>c</sup>  | 3.08 ± 0.587 <sup>c</sup>  | 0.76 ± 0.486 <sup>c</sup>          | 0.81 ± 0.578 <sup>c</sup>  | 0.78 ± 0.386 <sup>c</sup> |
| S + K <sub>2</sub>  | 2.31 ± 0.266 <sup>c</sup>             | 2.45 ± 0.598 <sup>d</sup>  | 2.38 ± 0.584 <sup>d</sup>  | 0.77 ± 0.384 <sup>cd</sup>            | 0.83 ± 0.527 <sup>d</sup>  | 0.80 ± 0.535 <sup>d</sup>  | 3.09 ± 0.864 <sup>de</sup>                | 3.28 ± 0.636 <sup>d</sup>  | 3.18 ± 0.668 <sup>d</sup>  | 1.34 ± 0.577 <sup>a</sup>          | 1.78 ± 0.635 <sup>a</sup>  | 1.56 ± 0.648 <sup>a</sup> |

\*C = Control, EI = Early irrigation, LI = Late irrigation, S = Stress,

\*values in columns followed by the same letter are not significantly different,  $p \leq 0.05$ , LSD.

<https://doi.org/10.1371/journal.pone.0257023.t004>



a + b) were observed in treatments S + K<sub>0</sub> (2.73 mg g<sup>-1</sup> FW), LI + K<sub>0</sub> (3.02 mg g<sup>-1</sup> FW), and LI + K<sub>1</sub> (3.08 mg g<sup>-1</sup> FW). The highest carotenoid levels were observed in treatments S + K<sub>2</sub> (1.56 mg g<sup>-1</sup> FW), LI + K<sub>2</sub> (1.29 mg g<sup>-1</sup> FW), and EI + K<sub>2</sub> (0.91 mg g<sup>-1</sup> FW), while the lowest levels were observed in treatments C + K<sub>0</sub> (0.31 mg g<sup>-1</sup> FW), EI + K<sub>0</sub> (0.39 mg g<sup>-1</sup> FW), and LI + K<sub>0</sub> (0.42 mg g<sup>-1</sup> FW) (Table 4). Overall, cultivar RH-749 showed higher contents of chlorophyll and carotenoids than RH-725.

## Discussion

Among the abiotic stresses, the lack of water has the most severe effects on crop growth and yield, and plants must adapt to water stress to survive. The bulk of the potassium requirement of plants, used to maintain average growth and development, is absorbed from the soil [26, 27]. Excess or deficiency in potassium hampers the plant's overall growth [28] because it is required for various biochemical and physiological processes, including protein synthesis, carbohydrate metabolism, and enzyme activation [29].

During water stress, a plant's water potential is decreased to the extent that cellular activity is hampered [30]. By disturbing the water potential, any abiotic stress can reduce crop cellular activities during the flowering and grain filling stages. Fertilizers, particularly potassium, play a significant role in adjusting the osmotic potential [14]. It also plays a role in many fundamental processes, such as nitrogen use, protein biosynthesis, cell growth, cell expansion (by stimulating gibberellins), and overall plant development. Thus, plant FW, DW, leaf area, and plant height were significantly higher in RH-749 [31, 32]. Potassium plays a role in increasing the efficiency of chlorophyll (the main component of chloroplasts), thereby increasing photosynthesis. The formation of carbohydrates was accelerated in our experimental treatments where potassium fertilizer was added [33, 34]. Potassium also increases carotenoid levels during stress, possibly by inhibiting the proteins (porins and transporter) in the thylakoid membranes of the chloroplast [34, 35]. This may be why total chlorophyll and carotenoid levels in treatments increased more in RH-749 than RH-725. These previous works indicated that potassium can accelerate enzymatic biochemical reactions and encourage early growth, which supports our findings [30, 32, 35]. For example, potassium influences the transport of sap and expansin proteins [36, 37]. In another example, it was reported to have helped loosen cell walls by activating the ATPase pump that generates acidic conditions in the periplasmic space [38].

As mentioned above, potassium can modify the utilization of nitrogen, the most abundant element in the earth's atmosphere and plays a significant role in crop maturation, especially during fruit development [39, 40]. Nitrate acquisition is frequently correlated with potassium fertilizer (K<sub>2</sub>SO<sub>4</sub>), resulting in enhanced amino acids and proteins [31]. As a mobile element, potassium also regulates osmotic pressure and maintains ionic stability within the cytoplasm [41]. The various roles potassium plays are related to the opening and closing of stomata and other physiological processes [41]. This explains why, in plants treated with potassium, the osmotic potential, relative water content, membrane stability index, and electrolytic content increased [42, 43]. Others have reported that potassium induces the enhancement of proline, a substance that responds to stress and regulates osmotic and turgor pressure [44, 45]. Potassium helps maintain the electrical balance within cells, specifically at the site of ATP synthesis and is responsible for controlling the opening and closing of guard cells, thus regulating photosynthesis [46, 47]. The involvement of potassium in all these processes explains why electrolyte leakage and osmotic potential were lower in RH-749 treatments than those for RH-725. Water conductivity and photosynthetic efficiency were also higher. Potassium fertilizers are also known to help fruit development in *Malus domestica* and *Pyrus* [48, 49].

The higher application rates of  $K_2SO_4$  significantly improved the morphological traits of both *B. juncea* cultivars under low water conditions, including water stress. Similarly, Hu, Jiang [50] reported increased levels of stress response-related enzymes. Potassium is a cofactor in various enzymatic reactions in carbohydrate biosynthesis, photosynthesis, and stress regulation [51]. CAT (a tetrameric haem-containing enzyme) detoxifies reactive oxygen species by converting hydrogen peroxide into water [52], while POD mainly oxidizes OH free radicals into  $H_2O$  [53]. Ascorbic acid-dependent APX is the only enzyme capable of scavenging  $H_2O_2$  in the chloroplast, where CAT is not present [35]. Akram, Iqbal [54] confirmed that CAT and POD were upregulated in two cultivars of *B. napus* upon exposure to water deficit conditions. Research by Al Mahmud, Hasanuzzaman [55] showed that *B. juncea* forms ascorbic acid and CAT in response to cadmium toxicity while synthesizing dehydroascorbate reductase (DHAR), SOD, monodehydroascorbate reductase (MDHAR), and GR upon potassium application. The application of potassium also mitigates water stress in many other crop plants such as *Nicotiana rustica*, *Zea mays*, and *Oryza sativa* [32, 45, 56]. Potassium also alleviates salt stress because it is, directly and indirectly, involved in antioxidant activation, an adaptive salt-stress response [57]. Furthermore, potassium also regulates plant development by augmenting the flavonoids, phenolics, polyphenols, antioxidants, and secondary metabolites of plants during stress [58].

## Conclusion

Our results show varietal differences in *B. juncea* responses to potassium application. When treated with optimal potassium levels, RH-749 had i) higher water-holding efficiency, ii) enhanced photosynthesis, iii) upregulated enzymatic activity, iv) less electrolytic leakage, and v) improved overall development compared to RH-725. Although potassium is an essential nutrient, it is not involved in the physiological functions mentioned in the paper. However, it improves nitrogen and carbon use efficiency. Potassium and nitrogen, separately or together, affected the yield and quality of *Brassica juncea*. In both cultivars, a high application rate of potassium fertilizer resulted in increased activity of all antioxidant enzymes; however, the maximum responses to potassium under all irrigation regimes were observed in RH-749.

Furthermore, the levels of all the photosynthetic pigments decreased as water stress increased. The maximum pigment levels occurred in the control for all concentrations of potassium. However, these levels were significantly reduced under stress conditions. High application rates for potassium alleviated the negative effect of water stress, as shown by the increased levels of photosynthetic pigments.

## Acknowledgments

The authors would like to thank the Deanship of Scientific Research at Taif University for supporting this work through Taif University Researchers Supporting Project Number (TURSP-2020/203), Taif University, Taif, Saudi Arabia. The research in LW lab is supported by Institut Teknologi Sumatera under Research Grant for Hibah Publikasi GBU-45.

## Author Contributions

**Conceptualization:** Preeti Rani, Narender Singh, Prashant Kaushik, Leonard Wijaya, Amal Al-Barty, Hadeer Darwish, Ahmed Noureldeem.

**Data curation:** Preeti Rani, Ishan Saini, Narender Singh.

**Formal analysis:** Narender Singh.

**Funding acquisition:** Leonard Wijaya, Amal Al-Barty, Hadeer Darwish, Ahmed Noureldeen.

**Methodology:** Preeti Rani.

**Project administration:** Preeti Rani.

**Resources:** Preeti Rani, Ishan Saini.

**Software:** Preeti Rani, Ishan Saini, Narender Singh.

**Supervision:** Preeti Rani.

**Validation:** Ishan Saini.

**Visualization:** Ishan Saini.

**Writing – original draft:** Narender Singh, Leonard Wijaya.

**Writing – review & editing:** Preeti Rani, Ishan Saini, Narender Singh, Prashant Kaushik, Leonard Wijaya, Amal Al-Barty, Hadeer Darwish, Ahmed Noureldeen.

## References

1. Singh I, Smita S, Mishra DC, Kumar S, Singh BK, Rai A. Abiotic stress responsive miRNA-target network and related markers (SNP, SSR) in *Brassica juncea*. *Front Plant Sci.* 2017; 8:1943. <https://doi.org/10.3389/fpls.2017.01943> PMID: 29209340
2. Wilson RA, Sangha M, Banga S, Atwal A, Gupta S. Heat stress tolerance in relation to oxidative stress and antioxidants in *Brassica juncea*. *J Environ Biol.* 2014; 35(2):383. PMID: 24665766
3. Gurajala HK, Cao X, Tang L, Ramesh TM, Lu M, Yang X. Comparative assessment of Indian mustard (*Brassica juncea* L.) genotypes for phytoremediation of Cd and Pb contaminated soils. *Environ Pollut.* 2019; 254:113085. <https://doi.org/10.1016/j.envpol.2019.113085> PMID: 31494406
4. Saini I, Yadav VK, Aggarwal A, Kaushik P. Effect of superphosphate, urea and bioinoculants on *Zinnia elegans* Jacq. *Ind J Exp Biol.* 2020; 58(10):730–7.
5. Wanasundara J, Tan S, Alashi A, Pudel F, Blanchard C. Proteins from canola/rapeseed: Current status. *Sustainable protein sources*: Elsevier; 2017. p. 285–304.
6. Rouphael Y, Colla G. Biostimulants in Agriculture. *Front Plant Sci.* 2020; 11. <https://doi.org/10.3389/fpls.2020.00040> PMID: 32117379
7. Kaya C, Ashraf M, Wijaya L, Ahmad P. The putative role of endogenous nitric oxide in brassinosteroid-induced antioxidant defence system in pepper (*Capsicum annum* L.) plants under water stress. *Plant Physiology and Biochemistry.* 2019; 143: 119–128. <https://doi.org/10.1016/j.plaphy.2019.08.024> PMID: 31493672
8. Schwalm CR, Anderegg WR, Michalak AM, Fisher JB, Biondi F, Koch G, et al. Global patterns of drought recovery. *Nature.* 2017; 548(7666):202–5. <https://doi.org/10.1038/nature23021> PMID: 28796213
9. Kosar F, Akram NA, Ashraf M, Ahmad A, Alyemeni MN, Ahmad P. Impact of exogenously applied trehalose on leaf biochemistry, achene yield and oil composition of sunflower under drought stress. *Physiologia Plantarum.* 2020.
10. Raja V, Qadir SU, Alyemeni MN, Ahmad P. Impact of drought and heat stress individually and in combination on physio-biochemical parameters, antioxidant responses, and gene expression in *Solanum lycopersicum*. *3 Biotech.* 2020; 10: 1–18.
11. Saini I, Aggarwal A, Kaushik P. Inoculation with mycorrhizal fungi and other microbes to improve the morpho-physiological and floral traits of *Gazania rigens* (L.) Gaertn. *Agriculture.* 2019; 9(3):51.
12. Ray K, Sengupta K, Pal A, Banerjee H. Effects of sulphur fertilization on yield, S uptake and quality of Indian mustard under varied irrigation regimes. *Plant, Soil Env.* 2015; 61(1):6–10.
13. Kruashvili I, Bziava K, Inashvili I, Lomishvili M. Determination of optimal irrigation rates of agricultural crops under consideration of soil properties and climatic conditions. *Ann Agrarian Sci.* 2016; 14(3):217–21.
14. Wang R, Gao M, Ji S, Wang S, Meng Y, Zhou Z. Carbon allocation, osmotic adjustment, antioxidant capacity and growth in cotton under long-term soil drought during flowering and boll-forming period. *Plant Physiol Biochem.* 2016; 107:137–46. <https://doi.org/10.1016/j.plaphy.2016.05.035> PMID: 27288990

15. Jaiswal DK, Verma JP, Prakash S, Meena VS, Meena RS. Potassium as an important plant nutrient in sustainable agriculture: a state of the art. Potassium solubilizing microorganisms for sustainable agriculture: Springer; 2016. p. 21–9.
16. Jha Y. Potassium mobilizing bacteria: enhance potassium intake in paddy to regulates membrane permeability and accumulate carbohydrates under salinity stress. *Braz J Biol Sci.* 2017; 4(8):333–44.
17. Zahoor R, Dong H, Abid M, Zhao W, Wang Y, Zhou Z. Potassium fertilizer improves drought stress alleviation potential in cotton by enhancing photosynthesis and carbohydrate metabolism. *Environ Exp Bot.* 2017; 137:73–83.
18. Ali S, Gill RA, Ulhassan Z, Najeeb U, Kanwar MK, Abid M, et al. Insights on the responses of *Brassica napus* cultivars against the cobalt-stress as revealed by carbon assimilation, anatomical changes and secondary metabolites. *Environ Exp Bot.* 2018; 156: 183–96.
19. Bandyopadhyay K, Aggarwal P, Chakraborty D, Pradhan S, Garg RN, Singh R. *Practical Manual on Measurement of Soil Physical Properties.* Division of Agricultural Physics, Indian Agricultural Research Institute, New Delhi-110012, India. 2012: 62.
20. Ali Q, Ali S, Iqbal N, Javed MT, Rizwan M, Khaliq R, et al. Alpha-tocopherol fertigation confers growth physio-biochemical and qualitative yield enhancement in field grown water deficit wheat (*Triticum aestivum* L.). *Scientific reports.* 2019; 9: 1–15.
21. Dionisio-Sese ML, Tobita S. Antioxidant responses of rice seedlings to salinity stress. *Plant Sci.* 1998; 135(1):1–9.
22. Nishikimi M, Rao NA, Yagi K. The occurrence of superoxide anion in the reaction of reduced phenazine methosulfate and molecular oxygen. *Biochem Biophys Res Commun.* 1972; 46(2):849–54. [https://doi.org/10.1016/s0006-291x\(72\)80218-3](https://doi.org/10.1016/s0006-291x(72)80218-3) PMID: 4400444
23. Aebi H. [13] Catalase in vitro. *Methods Enzymol.* 105: Elsevier; 1984. p. 121–6. [https://doi.org/10.1016/s0076-6879\(84\)05016-3](https://doi.org/10.1016/s0076-6879(84)05016-3) PMID: 6727660
24. Nakano Y, Asada K. Hydrogen peroxide is scavenged by ascorbate-specific peroxidase in spinach chloroplasts. *Plant Cell Physiol.* 1981; 22(5):867–80.
25. Halliwell B, Foyer C. Properties and physiological function of a glutathione reductase purified from spinach leaves by affinity chromatography. *Planta.* 1978; 139(1):9–17. <https://doi.org/10.1007/BF00390803> PMID: 24414099
26. Elumalai RP, Nagpal P, Reed JW. A mutation in the Arabidopsis KT2/KUP2 potassium transporter gene affects shoot cell expansion. *The Plant Cell.* 2002; 14(1):119–31. <https://doi.org/10.1105/tpc.010322> PMID: 11826303
27. Maathuis FJ, Sanders D. Mechanisms of potassium absorption by higher plant roots. *Physiol Plant.* 1996; 96(1):158–68.
28. Hasanuzzaman M, Bhuyan M, Nahar K, Hossain M, Mahmud JA, Hossen M, et al. Potassium: A vital regulator of plant responses and tolerance to abiotic stresses. *Agronomy.* 2018; 8(3):31.
29. Wang M, Zheng Q, Shen Q, Guo S. The critical role of potassium in plant stress response. *Int J Mol Sci.* 2013; 14(4):7370–90. <https://doi.org/10.3390/ijms14047370> PMID: 23549270
30. Jan S, Abbas N, Ashraf M, Ahmad P. Roles of potential plant hormones and transcription factors in controlling leaf senescence and drought tolerance. *Protoplasma.* 2019; 256: 313–329. <https://doi.org/10.1007/s00709-018-1310-5> PMID: 30311054
31. Coskun D, Britto DT, Kronzucker HJ. The nitrogen–potassium intersection: membranes, metabolism, and mechanism. *Plant, Cell Environ.* 2017; 40(10):2029–41.
32. Martineau E, Domec J-C, Bosc A, Denoroy P, Fandino VA, Lavres J Jr, et al. The effects of potassium nutrition on water use in field-grown maize (*Zea mays* L.). *Environ Exp Bot.* 2017; 134:62–71.
33. Benito B, Haro R, Amtmann A, Cuin TA, Dreyer I. The twins K<sup>+</sup> and Na<sup>+</sup> in plants. *J Plant Physiol.* 2014; 171(9):723–31. <https://doi.org/10.1016/j.jplph.2013.10.014> PMID: 24810769
34. Ahmad P, Jaleel CA, Salem MA, Nabi G, Sharma S (2010) Roles of enzymatic and nonenzymatic antioxidants in plants during abiotic stress. *Crit Rev Biotechnol.* 30(3):161–75. <https://doi.org/10.3109/07388550903524243> PMID: 20214435
35. Kohli SK, Khanna K, Bhardwaj R, Abd\_Allah EF, Ahmad P, Corpas FJ. Assessment of Subcellular ROS and NO Metabolism in Higher Plants: Multifunctional Signaling Molecules. *Antioxidants.* 2019; 8(12):641. <https://doi.org/10.3390/antiox8120641> PMID: 31842380
36. Daniel E, Rose CJ, John Lamb A. Potassium for crop production. University of Minnesota Extension. 2016.
37. Zhou S, Han Y-y, Chen Y, Kong X, Wang W. The involvement of expansins in response to water stress during leaf development in wheat. *J Plant Physiol.* 2015; 183:64–74. <https://doi.org/10.1016/j.jplph.2015.05.012> PMID: 26092364

38. Oosterhuis DM, Loka DA, Kawakami EM, Pettigrew WT. The physiology of potassium in crop production. *Advances in agronomy*. 126: Elsevier; 2014. p. 203–33.
39. Bai L, Deng H, Zhang X, Yu X, Li Y. Gibberellin is involved in inhibition of cucumber growth and nitrogen uptake at suboptimal root-zone temperatures. *PLoS one*. 2016; 11(5):e0156188. <https://doi.org/10.1371/journal.pone.0156188> PMID: 27213554
40. Chen G, Wang L, Fabrice MR, Tian Y, Qi K, Chen Q, et al. Physiological and nutritional responses of pear seedlings to nitrate concentrations. *Front Plant Sci*. 2018; 9:1679. <https://doi.org/10.3389/fpls.2018.01679> PMID: 30515181
41. Xu X, Du X, Wang F, Sha J, Chen Q, Tian G, et al. Effects of potassium levels on plant growth, accumulation and distribution of carbon, and nitrate metabolism in apple dwarf rootstock seedlings. *Front Plant Sci*. 2020; 11.
42. Ahanger MA, Agarwal R. Potassium up-regulates antioxidant metabolism and alleviates growth inhibition under water and osmotic stress in wheat (*Triticum aestivum* L.). *Protoplasma*. 2017; 254(4):1471–86. <https://doi.org/10.1007/s00709-016-1037-0> PMID: 27783181
43. Ahanger MA, Agarwal R, Tomar NS, Shrivastava M. Potassium induces positive changes in nitrogen metabolism and antioxidant system of oat (*Avena sativa* L cultivar Kent). *J Plant Interac*. 2015; 10(1):211–23.
44. Alinejad S, Sarabi V, Bakhtvari ARS, Hashempour H. Variation in physiological traits, yield and secondary metabolites of jimsonweed (*Datura stramonium* L.) under different irrigation regimes and nutrition systems. *Indust Crops Prod*. 2020; 143:111916.
45. Zain NAM, Ismail MR. Effects of potassium rates and types on growth, leaf gas exchange and biochemical changes in rice (*Oryza sativa*) planted under cyclic water stress. *Agric Water Manage*. 2016; 164:83–90.
46. Hafeez A, Ali S, Ma X, Tung SA, Shah AN, Liu A, et al. Potassium to nitrogen ratio favors photosynthesis in late-planted cotton at high planting density. *Indust Crops Prod*. 2018; 124:369–81.
47. K M. Potassium. In: Pilbeam DJ, editor. *Handbook of plant nutrition*: CRC Press; 2016. p. 107–36.
48. Wang F, Sha J, Chen Q, Xu X, Zhu Z, Ge S, et al. Exogenous Abscisic Acid Regulates Distribution of <sup>13</sup>C and <sup>15</sup>N and Anthocyanin Synthesis in 'Red Fuji' Apple Fruit Under High Nitrogen Supply. *Front Plant Sci*. 2020; 10:1738. <https://doi.org/10.3389/fpls.2019.01738> PMID: 32063908
49. Wang Y, Zhang H, Huang X. Effect of potassium supply on plant potassium distribution and growth and leaf photosynthetic capacity of *Pyrus pyrifolia*. *J Nanjing Agric Univ*. 2017; 40(1):60–7.
50. Hu W, Jiang N, Yang J, Meng Y, Wang Y, Chen B, et al. Potassium (K) supply affects K accumulation and photosynthetic physiology in two cotton (*Gossypium hirsutum* L.) cultivars with different K sensitivities. *Field Crops Res*. 2016; 196:51–63.
51. El-Mogy MM, Salama AM, Mohamed HF, Abdelgawad KF, Abdeldaym EA. Responding of long green pepper plants to different sources of foliar potassium fertiliser. *Agriculture (Pol'nohospodárstvo)*. 2019; 65(2):59–76.
52. Mehla N, Sindhi V, Josula D, Bisht P, Wani SH. An introduction to antioxidants and their roles in plant stress tolerance. *Reactive oxygen species and antioxidant Systems in Plants: role and regulation under abiotic stress*: Springer; 2017. p. 1–23.
53. Jovanović SV, Kukavica B, Vidović M, Morina F, Menckhoff L. Class III peroxidases: functions, localization and redox regulation of isoenzymes. *Antioxidants and Antioxidant Enzymes in Higher Plants*: Springer; 2018. p. 269–300.
54. Akram NA, Iqbal M, Muhammad A, Ashraf M, Al-Qurainy F, Shafiq S. Aminolevulinic acid and nitric oxide regulate oxidative defense and secondary metabolisms in canola (*Brassica napus* L.) under drought stress. *Protoplasma*. 2018; 255(1):163–74. <https://doi.org/10.1007/s00709-017-1140-x> PMID: 28699026
55. Al Mahmud J, Hasanuzzaman M, Nahar K, Bhuyan MB, Fujita M. Insights into citric acid-induced cadmium tolerance and phytoremediation in *Brassica juncea* L.: coordinated functions of metal chelation, antioxidant defense and glyoxalase systems. *Ecotoxicol Environ Saf*. 2018; 147:990–1001. <https://doi.org/10.1016/j.ecoenv.2017.09.045> PMID: 29976011
56. Farooq A, Bukhari SA, Akram NA, Ashraf M, Wijaya L, Alyemeni MN, et al. Exogenously applied ascorbic acid-mediated changes in osmoprotection and oxidative defense system enhanced water stress tolerance in different cultivars of safflower (*Carthamus tinctorious* L.). *Plants*. 2020; 9: 104.
57. Begum N, Ahanger MA, Su Y, Lei Y, Mustafa NSA, Ahmad P, et al. Improved drought tolerance by AMF inoculation in maize (*Zea mays*) involves physiological and biochemical implications. *Plants*. 2019; 8: 579. <https://doi.org/10.3390/plants8120579> PMID: 31817760
58. Munene R, Changamu E, Korir N, Joseph G-O. Effects of different nitrogen forms on growth, phenolics, flavonoids and antioxidant activity in amaranth species. *Trop Plant Res*. 2017; 4(1):81–9.
